# Supplementary material
Source: PubMed Central journal article supplement (PMC8576631)
Supplement: jamapediatr-e214375-s002.pdf [file jamapediatr-e214375-s002.pdf]

1

2

3

4 **The Diet, ExerCIse and CarDiovascular hEalth study**

5 **(DECIDE) study for children: DECIDE-Children**

6

7

8

**STATISTICAL ANALYSIS PLAN**

9

10

11

**Version 3**

12

**2018/07/0**

13

14

## Contents

15

|    |   |                                |   |
|----|---|--------------------------------|---|
| 16 | 1 | Study objective .....          | 3 |
| 17 | 2 | Study design .....             | 3 |
| 18 | 3 | Study period and settings..... | 3 |
| 19 | 4 | Randomization.....             | 3 |
| 20 | 5 | Intervention.....              | 4 |
| 21 | 6 | Outcomes .....                 | 4 |
| 22 | 7 | Methods .....                  | 5 |
| 23 | 8 | Statistical software.....      | 7 |
| 24 | 9 | Proposed Main Tables.....      | 7 |

25

26

27           **1 Study objective**

28    To assess the effectiveness of a multifaceted intervention to prevent obesity among  
29    Grade 4 primary school children (8-10 years old) in China.

30

31           **2 Study design**

32    This is a cluster randomized clinical trial with 24 schools among approximately 1200  
33    children from 5 study sites selected from 3 regions across China.

34

35           **3 Study period and settings**

- 36    • Study period: September 2018~June 2019
- 37    • Study settings: A total of 24 schools from 5 study sites in Beijing, Changzhi of  
38    Shanxi province, and Urumuqi of Xinjiang province in China.

39

40           **4 Randomization**

41    The random sequence of allocation of the schools (clusters) to the intervention or  
42    control group will be stratified by the study sites. Schools in the same study site will  
43    be randomly allocated in a 1:1 ratio to either the intervention or control group using a  
44    computer-generated random number system (the simple random sampling method).  
45    Randomisation will be performed by an independent person at the central  
46    coordinating centre at Peking University Clinical Research Institute. The  
47    randomisation will take place only after the baseline measurements are completed to  
48    ensure allocation concealment.

49

## 50        **5 Intervention**

51 Multifaceted health promotion programme was designed and will be used as the  
52 intervention. Detailed description of the intervention was provided in the study  
53 protocol.

54

## 55        **6 Outcomes**

### 56        **6.1 Primary outcome**

57 The primary outcome is defined as the between-group difference in children's change  
58 of body mass index (BMI) from baseline to 9 months (immediately after the  
59 intervention completion), where  $BMI (kg/m^2) = weight (kg)/(height (m))^2$ .

60

### 61        **6.2 Secondary outcomes**

62 (1) The outcomes between groups at 4 and 9 months:

- 63        • Change in BMI Z-score<sup>[1]</sup>
- 64        • Change in prevalence and incidence of overweight/obesity<sup>[2]</sup>
- 65        • Change in waist circumference (cm)
- 66        • Change in waist-to-hip circumference ratio
- 67        • Change in systolic blood pressures (mmHg)
- 68        • Change in diastolic blood pressures (mmHg)

69

70 (2) The outcomes between groups at 9 months:

- 71        • Change in body fat percentage
- 72        • Change in physical fitness measures, including number of rope jumps within one  
73        minute, duration of shuttle run (50 m × 8, unit: s), distance of long standing  
74        jump, and number of sit-ups within one minute.

- 75 • Change in screen time
- 76 • Change in moderate-to-vigorous-intensity physical activity
- 77 • Change in dietary behaviours<sup>[3]</sup>
- 78 • Change in knowledge related to energy balance
- 79 • Change in stage of readiness for behaviour change related to weight
- 80 management<sup>[4]</sup>

81

## 82 **7 Methods**

### 83 **7.1 Sample size calculation**

84 We assumed that the between-group difference in the change of BMI from baseline to  
85 9 months would be 0.50 kg/m<sup>2</sup>, standard deviation (SD) of the BMI would be 1.40  
86 kg/m<sup>2</sup>, the intra-cluster correlation coefficient would be 0.05 and the attrition rate  
87 would be 10%<sup>[5]</sup>. We estimated that a total of 1200 students from 24 schools with an  
88 average cluster size of 50 students per school would provide 88% power with  $\alpha=0.05$   
89 to detect the assumed difference between the intervention and control groups.

90

### 91 **7.2 Analysis set**

92 The primary analysis will be based on the intention-to-treat principle and will include  
93 all children recruited with the baseline BMIs measured. If the percentage of missing  
94 data exceeds 5%, sensitivity analysis will be performed on the primary outcome using  
95 the last-value-carry-forward imputation.

96

### 97 **7.3 Statistical models**

98 A mixed-effect model will be used, with adjustment for the school-clustering effect

99 (the random effect).

100 Using BMI as an example, the model was shown as below:

$$101 \quad Y_{ij} = \beta_0 + b_i + \beta_1 Group + \beta_2 BMI_{baseline} + \beta_3 Age_{baseline} + \beta_4 Sex + \varepsilon_{ij},$$

$$102 \quad i = 1, 2, \dots, 24, \quad j = 1, 2, \dots, n_i, \quad b_i \sim N(0, \sigma_b^2), \quad \varepsilon_{ij} \sim N(0, \sigma^2)$$

103 where  $Y_{ij}$  is the change in BMI from baseline to 9 months (BMI at 9 months – BMI at  
104 baseline) for observation  $j$  on school  $i$ ,  $\beta_0$  is the mean BMI across the population of  
105 schools being sampled,  $b_i$  is a random variable representing the deviation from the  
106 population mean of the mean BMI for the  $i$ th school, and  $\varepsilon_{ij}$  is a random variable  
107 representing the deviation in BMI for observation  $j$  on school  $i$  from the mean BMI  
108 for school  $i$ . *Group* represents the group allocation (i.e., 1=intervention and  
109 0=control), and  $\beta_1$  is the effect of interest.

110

#### 111 **7.4 Estimation of intra-cluster correlation coefficient**

112 We will estimate the intra-cluster correlation coefficient for the primary outcome to  
113 compare the between-cluster variance as a fraction of the total variance (intra-cluster  
114 correlation coefficient = (between-cluster variance)/(between-cluster variance +  
115 within-cluster variance)).

116

#### 117 **7.5 Subgroup analysis**

118 We will examine whether the primary outcome varies by region (Beijing, Changzhi of  
119 Shanxi province, Urumuqi of Xinjiang province), sex of children (boy, girl), maternal  
120 education (high school or below, above high school), BMI status at baseline  
121 (overweight/obese, not overweight/obese), and primary caregivers of the children  
122 (parents, non-parents).

123

## 124 **8 Statistical software**

125 Statistical analyses will be performed using SAS version 9.4 (SAS Institute Inc., Cary,  
126 NC, USA).

127

## 128 **9 Proposed main tables**

129 (1) Table 1 will describe baseline characteristics of schools and children participating  
130 in the DECIDE-Children study, including

- 131 • Number of schools and children, overall and by trial arm
- 132 • Median (range) number of children per school
- 133 • Number of children in three regions, overall and by trial arm
- 134 • Sex-specific number of children, overall and by trial arm
- 135 • Number of children whose primary caregivers were parents or non-parents,  
136 overall and by trial arm
- 137 • Number of children in varying levels of maternal education, overall and by  
138 trial arm
- 139 • Mean and SD of age, height, weight, BMI, and BMI Z-score

140 The mocked table 1 is shown below:

**Mock Table 1** The baseline characteristics of schools and children participating in the DECIDE-Children study, overall and by trial arm

|                                          | All        | Intervention group | Control group |
|------------------------------------------|------------|--------------------|---------------|
| <b>Cluster level</b>                     |            |                    |               |
| Number of schools                        | xx         | xx                 | xx            |
| Median (range) number of children/school | xx (xx-xx) | xx (xx-xx)         | xx (xx-xx)    |
| <b>Individual level</b>                  |            |                    |               |

|                                  |             |             |             |
|----------------------------------|-------------|-------------|-------------|
| Number of children               | xxxx        | xxx         | xxx         |
| Region, n (%)                    |             |             |             |
| Beijing                          | xxx (xx.x)  | xxx (xx.x)  | xxx (xx.x)  |
| Shanxi                           | xxx (xx.x)  | xxx (xx.x)  | xxx (xx.x)  |
| Xinjiang                         | xxx (xx.x)  | xxx (xx.x)  | xxx (xx.x)  |
| Sex, n (%)                       |             |             |             |
| Male                             | xxx (xx.x)  | xxx (xx.x)  | xxx (xx.x)  |
| Female                           | xxx (xx.x)  | xxx (xx.x)  | xxx (xx.x)  |
| Primary caregiver, n (%)         |             |             |             |
| Parents                          | xxx (xx.x)  | xxx (xx.x)  | xxx (xx.x)  |
| Non-parents                      | xxx (xx.x)  | xxx (xx.x)  | xxx (xx.x)  |
| Maternal education, n (%)        |             |             |             |
| High school or below             | xxx (xx.x)  | xxx (xx.x)  | xxx (xx.x)  |
| Above high school                | xxx (xx.x)  | xxx (xx.x)  | xxx (xx.x)  |
| Mean age (SD), year              | x.x (x.x)   | x.x (x.x)   | x.x (x.x)   |
| Mean height (SD), cm             | xxx.x (x.x) | xxx.x (x.x) | xxx.x (x.x) |
| Mean weight (SD), kg             | xx.x (x.x)  | xx.x (x.x)  | xx.x (x.x)  |
| Mean BMI (SD), kg/m <sup>2</sup> | xx.x (x.x)  | xx.x (x.x)  | xx.x (x.x)  |
| Mean BMI Z-score (SD)            | x.x (x.x)   | x.x (x.x)   | x.x (x.x)   |

141 Abbreviations: BMI=body mass index; SD=standard deviation.

142 (2) Table 2 will show intervention effects in the DECIDE-Children study

143     • For continuous outcomes, we will report pre/post-intervention means for the  
144       intervention and control groups, adjusted differences between groups, and the  
145       associated *P* values.

146     • For binary outcomes, we will report pre/post-intervention percentages for the  
147       intervention and control groups and adjusted odds ratios (ORs) between  
148       groups, 95% confidence intervals (CIs), and the associated *P* values.

149     • The           mocked           table           is           shown           below:



Mocked Table 2 Intervention effects in the DECIDE-Children study

| Outcomes                                        | N*      | Intervention                   |                                  | Control                        |                                  | Main comparison between groups<br>(intervention- control) |            |
|-------------------------------------------------|---------|--------------------------------|----------------------------------|--------------------------------|----------------------------------|-----------------------------------------------------------|------------|
|                                                 |         | Mean (SD)/n (%)<br>at baseline | Mean (SD)/n (%)<br>at 4/9 months | Mean (SD)/n (%)<br>at baseline | Mean (SD)/n (%)<br>at 4/9 months | Adjusted mean difference/<br>OR (95% CI)                  | P<br>value |
| <b>Adiposity</b>                                |         |                                |                                  |                                |                                  |                                                           |            |
| BMI                                             | xxx/xxx | xx.x (x.x)                     | xx.x (x.x)                       | xx.x (x.x)                     | xx.x (x.x)                       | x.xx (x.xx, x.xx)                                         | x.xxx      |
| BMI Z-score                                     | xxx/xxx | x.x (x.x)                      | x.x (x.x)                        | x.x (x.x)                      | x.x (x.x)                        | x.xx (x.xx, x.xx)                                         | x.xxx      |
| Obese                                           | xxx/xxx | xxx (xx.x%)                    | xxx (xx.x%)                      | xxx (xx.x%)                    | xxx (xx.x%)                      | x.xx (x.xx, x.xx)                                         | x.xxx      |
| Overweight or obese                             | xxx/xxx | xxx (xx.x%)                    | xxx (xx.x%)                      | xxx (xx.x%)                    | xxx (xx.x%)                      | x.xx (x.xx, x.xx)                                         | x.xxx      |
| Body fat percentage                             | xxx/xxx | xx.xx (xx.xx)                  | xx.xx (xx.xx)                    | xx.xx (xx.xx)                  | xx.xx (xx.xx)                    | x.xx (x.xx, x.xx)                                         | x.xxx      |
| Waist circumference, cm                         | xxx/xxx | xx.x (x.x)                     | xx.x (x.x)                       | xx.x (x.x)                     | xx.x (x.x)                       | x.xx (x.xx, x.xx)                                         | x.xxx      |
| Waist-to-hip ratio                              | xxx/xxx | x.xx (x.xx)                    | x.xx (x.xx)                      | x.xx (x.xx)                    | x.xx (x.xx)                      | x.xx (x.xx, x.xx)                                         | x.xxx      |
| <b>Physical activity and dietary behaviours</b> |         |                                |                                  |                                |                                  |                                                           |            |
| In the action stage of<br>behaviour change      | xxx/xxx | xxx (xx.x%)                    | xxx (xx.x%)                      | xxx (xx.x%)                    | xxx (xx.x%)                      | x.xx (x.xx, x.xx)                                         | x.xxx      |
| screen time<2 hours/day                         | xxx/xxx | xxx (xx.x%)                    | xxx (xx.x%)                      | xxx (xx.x%)                    | xxx (xx.x%)                      | x.xx (x.xx, x.xx)                                         | x.xxx      |
| Days performing MVPA ≥1<br>hour per week, days  | xxx/xxx | x.x (x.x)                      | x.x (x.x)                        | x.x (x.x)                      | x.x (x.x)                        | x.xx (x.xx, x.xx)                                         | x.xxx      |
| Not drinking sugar-<br>sweetened beverages      | xxx/xxx | xxx (xx.x%)                    | xxx (xx.x%)                      | xxx (xx.x%)                    | xxx (xx.x%)                      | x.xx (x.xx, x.xx)                                         | x.xxx      |
| Not eating fried food                           | xxx/xxx | xxx (xx.x%)                    | xxx (xx.x%)                      | xxx (xx.x%)                    | xxx (xx.x%)                      | x.xx (x.xx, x.xx)                                         | x.xxx      |
| Not eating western fast food                    | xxx/xxx | xxx (xx.x%)                    | xxx (xx.x%)                      | xxx (xx.x%)                    | xxx (xx.x%)                      | x.xx (x.xx, x.xx)                                         | x.xxx      |
| Emotional over-eating, score                    | xxx/xxx | x.x (x.x)                      | x.x (x.x)                        | x.x (x.x)                      | x.x (x.x)                        | x.xx (x.xx, x.xx)                                         | x.xxx      |
| Satiety responsiveness, score                   | xxx/xxx | xx.x (x.x)                     | xx.x (x.x)                       | xx.x (x.x)                     | xx.x (x.x)                       | x.xx (x.xx, x.xx)                                         | x.xxx      |
| <b>Obesity-related knowledge</b>                |         |                                |                                  |                                |                                  |                                                           |            |
| Obesity-related knowledge,<br>score             | xxx/xxx | x.x (x.x)                      | x.x (x.x)                        | x.x (x.x)                      | x.x (x.x)                        | x.xx (x.xx, x.xx)                                         | x.xxx      |
| <b>Physical fitness</b>                         |         |                                |                                  |                                |                                  |                                                           |            |
| Number of rope jumps<br>within one minute       | xxx/xxx | xxx.x (xx.x)                   | xxx.x (xx.x)                     | xxx.x (xx.x)                   | xxx.x (xx.x)                     | xx.xx (xx.xx, xx.xx)                                      | x.xxx      |

|                                        |         |              |              |              |              |                      |       |
|----------------------------------------|---------|--------------|--------------|--------------|--------------|----------------------|-------|
| Duration of shuttle run (50 m × 8), s  | xxx/xxx | xxx.x (xx.x) | xxx.x (xx.x) | xxx.x (xx.x) | xxx.x (xx.x) | xx.xx (xx.xx, xx.xx) | x.xxx |
| Distance of long standing jump, cm     | xxx/xxx | xxx.x (xx.x) | xxx.x (xx.x) | xxx.x (xx.x) | xxx.x (xx.x) | x.xx (x.xx, x.xx)    | x.xxx |
| Number of sit-ups within one minute, s | xxx/xxx | xx.x (x.x)   | xx.x (x.x)   | xx.x (x.x)   | xx.x (x.x)   | x.xx (x.xx, x.xx)    | x.xxx |
| <b>Blood pressure</b>                  |         |              |              |              |              |                      |       |
| SBP, mmHg                              | xxx/xxx | xxx.x (xx.x) | xxx.x (xx.x) | xxx.x (xx.x) | xxx.x (xx.x) | x.xx (x.xx, x.xx)    | x.xxx |
| DBP, mmHg                              | xxx/xxx | xx.x (x.x)   | xx.x (x.x)   | xx.x (x.x)   | xx.x (x.x)   | x.xx (x.xx, x.xx)    | x.xxx |

151 \* The number before “/” refers to that of the intervention group, and the number after “/” refers to that of the control group.

152 Abbreviations: BMI=body mass index; CI=confidence interval; DBP=diastolic blood pressure; MVPA=moderate-to-vigorous physical activity; OR=odds ratio; SBP=

153 Systolic blood pressure; SD=standard deviation.

154 **10 Proposed main figures**

155 (1) Figure 1 will show trial profile of the DECIDE-Children study according to the  
 156 CONSORT guidelines, including enrolment, allocation, follow-up, and analysis  
 157 phases of this cluster-randomized controlled trial of the intervention and control  
 158 groups.

159 The mocked figure 1 is shown below:

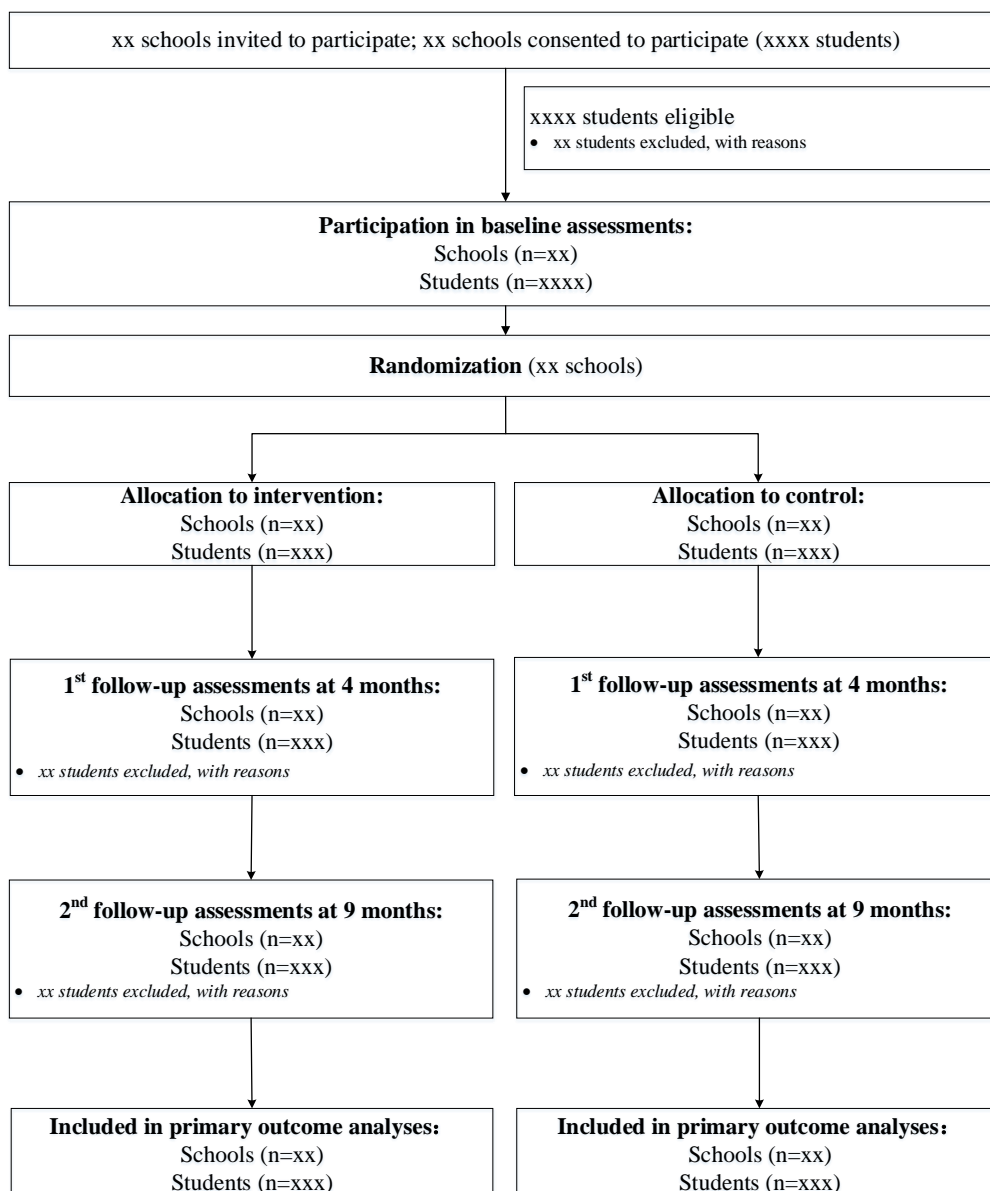

160

161 **Mocked Figure 1** Trial profile of the DECIDE-Children study

162 (2) Figure 2 will show results of subgroup analyses for the primary outcome.

- 163       • Forest plots will be used to show the subgroup analyses of the primary  
164       outcome.
- 165       • Number of children, adjusted mean difference (95% CI), and *P* values for  
166       interaction by different subgroups will be reported.

167

168   **Reference**

- 169   1 de Onis M, Onyango A, Borghi E. Development of a who growth reference for  
170   school- aged children and adolescents. Bull World Health Organ 2007;85:660–7.
- 171   2 National Health Commission of the People's Republic of China. Screening for  
172   overweight and obesity among school-age children and adolescents (WS/T 586-  
173   2018). Beijing, China; 2018.
- 174   3 Wardle J, Guthrie CA, Sanderson S, et al. Development of the children's eating  
175   behaviour questionnaire. J Child Psychol & Psychiat 2001;42:963–70.
- 176   4 Prochaska J, Di Clemente C, Norcross H. In search of how people change:  
177   applications to addictive behavior. Am Psychol 1992;47:1102–14.
- 178   5 Liu Z, Li Q, Maddison R, et al. A school-based comprehensive intervention  
179   for childhood obesity in China: a cluster randomized controlled trial. Child Obes  
180   2019; 15: 105–15.
