# Supplementary material
Source: PubMed Central journal article supplement (PMC8576631)
Supplement: jamapediatr-e214375-s004.pdf [file jamapediatr-e214375-s004.pdf]

## Data Sharing Statement

Liu. Effectiveness of a Multifaceted Intervention for Prevention of Obesity in Primary School Children in China. *JAMA Pediatr.* Published November 08, 2021.  
doi:10.1001/jamapediatrics.2021.4375

### Data

**Data available:** No
